# Supplementary material
Source: Research Square preprint supplement (doi:10.21203/rs.3.rs-8948009/v1)
Supplement: Supplementary file 1 [file e441caf4f67db1622cd0fd5a.docx]

**Table S1** List of targeted genes and their sequences used in qPCR.

| **Targeted gene** | **Sequence** | **Base pair (bp)** |
| --- | --- | --- |
| *Actin* F | CGAGGGTTATGCTTTGCCTC | 20 |
| *Actin* R | AGCAAGCTCCTCCTTCATGT | 20 |
| *PR1* F | CGTCTTTGTAGCTCTTGTAGG | 21 |
| *PR1* R | AGTCTGCAGTTGCCTCTT | 18 |
| *PR-3* F | TAGCCCTGGCGACAATCTTG | 20 |
| *PR-3* R | ATAGCTGTCCCCTGCATTGC | 20 |
| *LOX*  F | CTTCACTGCTGGTGCATACGG | 21 |
| *LOX* R | TCGTTGGCGTACGGATAGTC | 20 |
| *CAT* F | GTCGGAGGAGGAAATCATAGCC | 22 |
| *CAT* R | GCCAAGTCTTCGTCACATCAAG | 22 |
| *TPX* F | AGCATTGACAACACGTACC | 19 |
| *TPX* R | AGCACTCCCTGTCTTAACT | 19 |
| *CRT* F | TCCCAAATTCTGCGTACAAAGGTCC | 25 |
| *CRT* R | GAGCCAGCCTTCACCTGCCA | 20 |
| *NR* F' | TGCGTGGACTACTCAGAGAC | 19 |
| *NR* R' | CACCAACACCAGTACTTGCC | 20 |
| *NiR* F | GACATGGATGATCTAGCTCG | 20 |
| *NiR* R | GAGAATAGGTGGATCAGGTG | 20 |
| *NRT1.1* F | CATGATTCTTTGTATTGAGGCCGTGGAGA | 29 |
| *NRT1.1* R | ATGAACGGAATTGTTCAGCAGTGTGTGGCA | 27 |
| *NRT1.2* F | CATCGAGTTTTTGGGATTGATCATACTCACAAT | 33 |
| *NRT1.2* R | AACCGAAGCCGCAAGAAGAACCTTC | 25 |
| *NRT2.1* F | CCGACAAGACGGCCAAGTTCGACCT | 25 |
| *NRT2.1* R | TCCGTAGAGAAGAACGAAGATCCAAG | 26 |
| *NRT2.2* F | CAGGTGGAAACAGAGCTGCCATGG | 24 |
| *NRT2.2* R | GGACCATAGATACAACGGCAGTGACGAG | 28 |
| *GS* F | TTTCAAGTTGGACCTTCAGTTGG | 23 |
| *GS* R | CATACCCTCCCTCATTTCTCATA | 23 |
| *GSH* F | GAAATGGAGAGACTTGGC | 18 |
| *GSH* R | CAACAAGAAGCAATATGGGG | 20 |


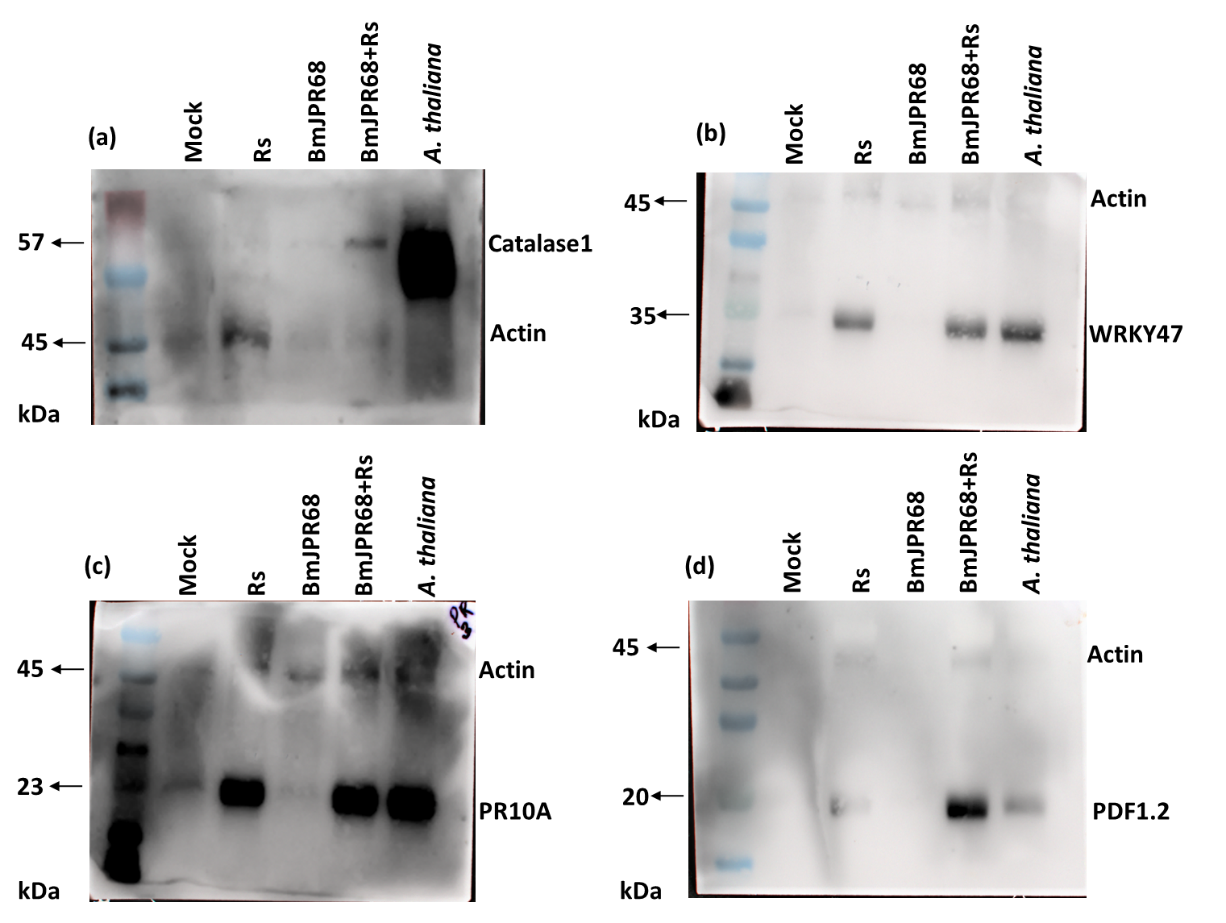


**Fig. S1** Western blot analyses of pathogenesis-related (PR) protein. (a-d) images showing full blot of actin expressed in the same blot after targeted protein detection. Each lane was loaded with 100 mg of protein. *Arabidopsis thaliana* L. ecotype Columbia-O, was used as positive control. Protein size given in kilodalton (kDa). Each gel was blotted and reacted with a different stress-specific protein antibody.


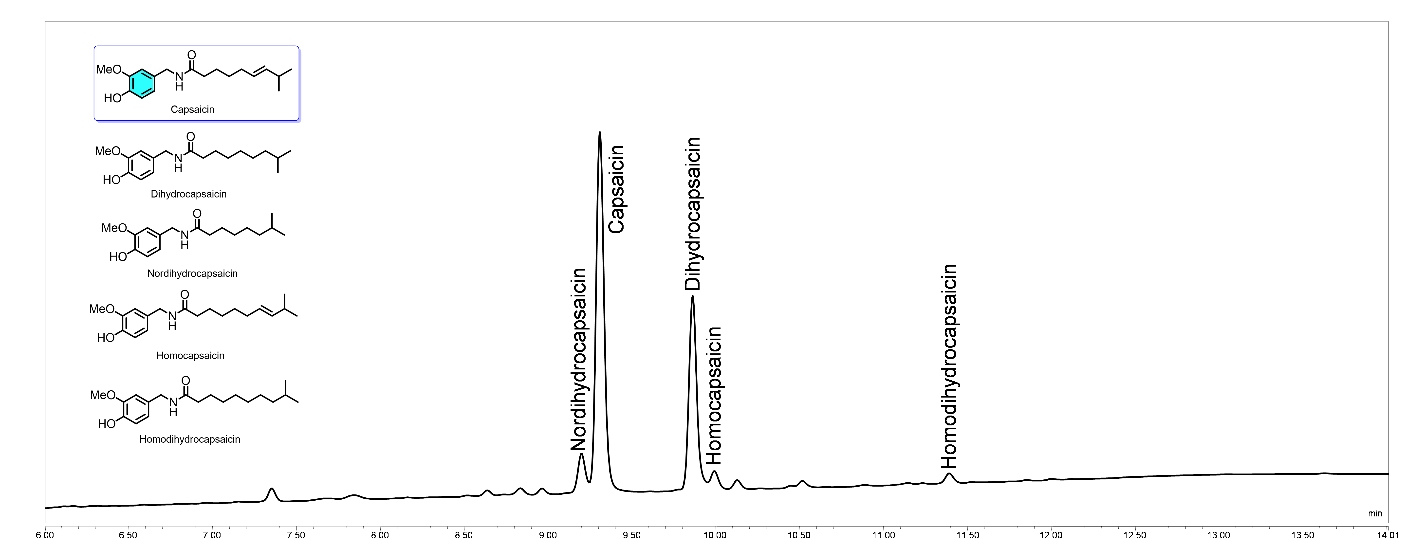


**Fig. S2** Chromatogram obtained by Bhut Jolokia extracts showing peaks for nordihydrocapsaicin, capsaicin, dihydrocapsaicin, homocapsaicin, homodihydrocapsaicin, and chemical structure of nordihydrocapsaicin and dihydrocapsaicin.

**
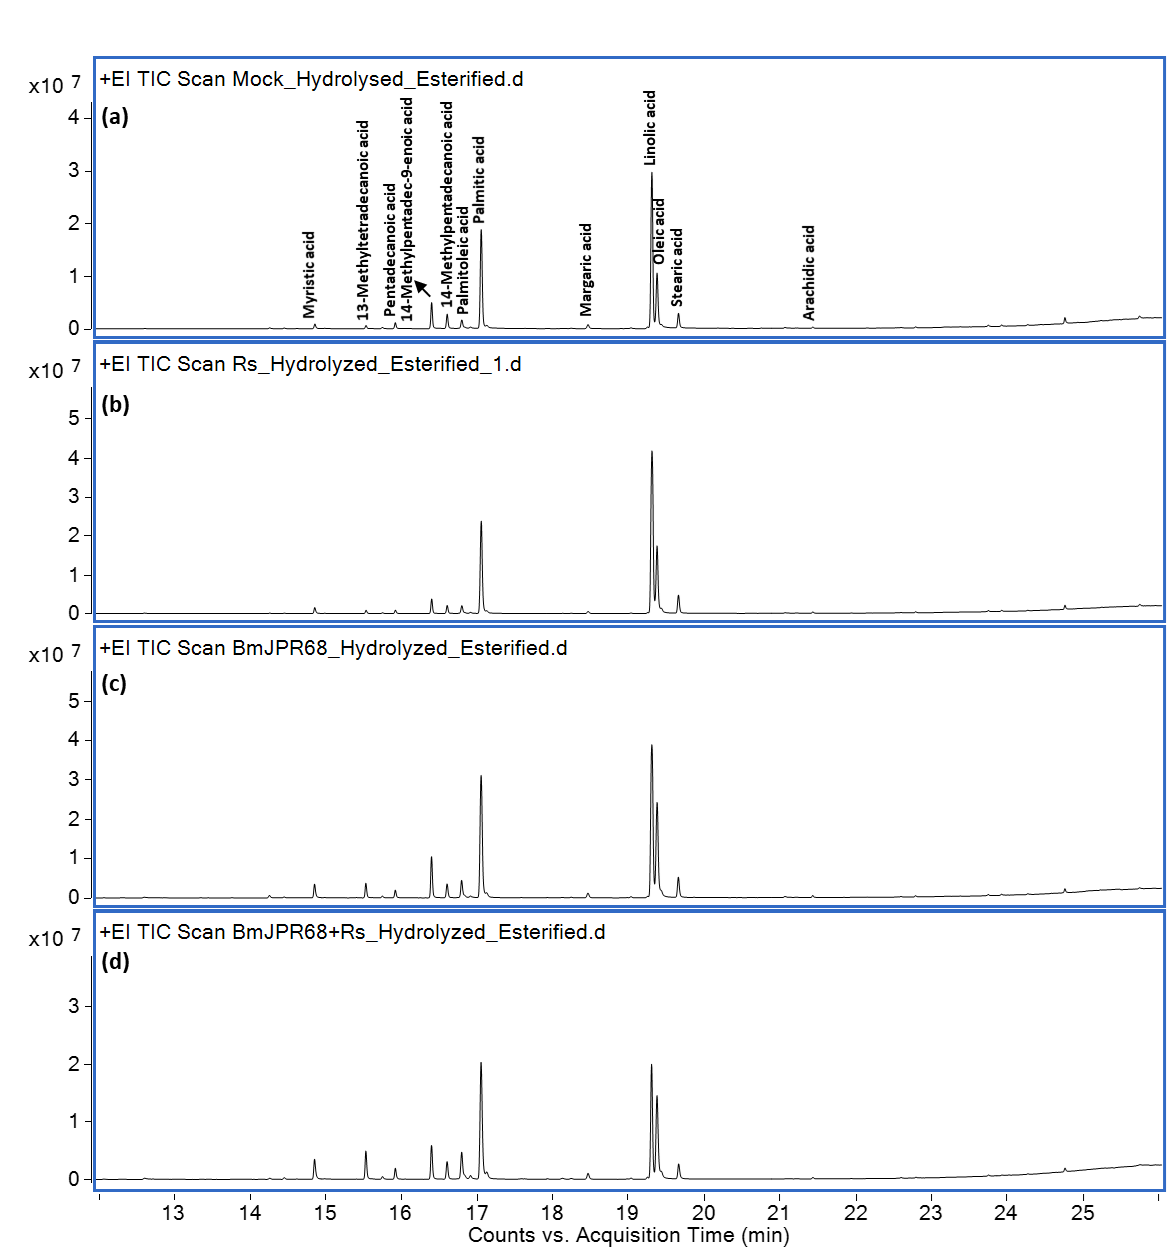
**

**Fig. S3** The stackplot of GCMS chromatogram for the esterified samples of Bhut Jolokia n-hexane extracts. The methylester pictures are labelled with corresponding fatty acids. a. water treated (mock) fruit extracts; b. pathogen (Rs) treated fruit extracts; c. BmJPR68 treated fruit extracts; d. BmJPR68+Rs treated fruit extracts.

**Table S2** Physico-chemical properties of soil in the study area. Different lowercase letters on the bars indicated a significant difference, as determined by Tukey test (*p≤*0.05). All data points were means ± SD (n = 3). Mean values and SDs at least for three biological replicates are shown.

| **Soil** | **Sand**  **(%)** | **Slit**  **(%)** | **Clay**  **(%)** | **pH**  **(in H2O)** | **EC (dSm-1)** | **MWHC (%)** | **N** | **P** | **K** | **Zn** | **Cu** | **Fe** | **Mn** | **Organic Carbon** |
| --- | --- | --- | --- | --- | --- | --- | --- | --- | --- | --- | --- | --- | --- | --- |
| **mg g-1** | | | | | | | |
| Mock | 22.5 | 21.27 | 56.23 | 6.5 | 3.3 | 65.42096 | 2.65±0.0721c | 0.43±0.001c | 0.659±0.01b | 0.069±0.002a | 0.0040±0.0012c | 4.19±0.027b | 0.535±0.009a | 2.61±1.07c |
| Rs | 24.16 | 30.29 | 45.5 | 5.9 | 3.1 | 39.78448 | 3.05±0.259bc | 0.68±0.002d | 0.56±0.03ab | 0.06±0.002b | 0.0021±0.009d | 3.99±0.035d | 0.65±0.01b | 1.4±0.17bc |
| BmJPR68 | 23.21 | 32.45 | 44.34 | 5.5 | 4.1 | 50.78512 | 3.39±0.095c | 2.01±0.004a | 0.82±0.078a | 0.1±0.003a | 0.0078±0.0049b | 6.28±0.012c | 0.697±0.007c | 17.5±2.63b |
| BmJPR68+Rs | 20.24 | 28.34 | 51.45 | 6.0 | 3.7 | 57.2093 | 4.342±0.1411a | 1.8±0.002b | 0.82±0.07ab | 0.1±0.007a | 0.015±0.006a | 5.62±0.035a | 0.659±0.011d | 20.1±0.44a |


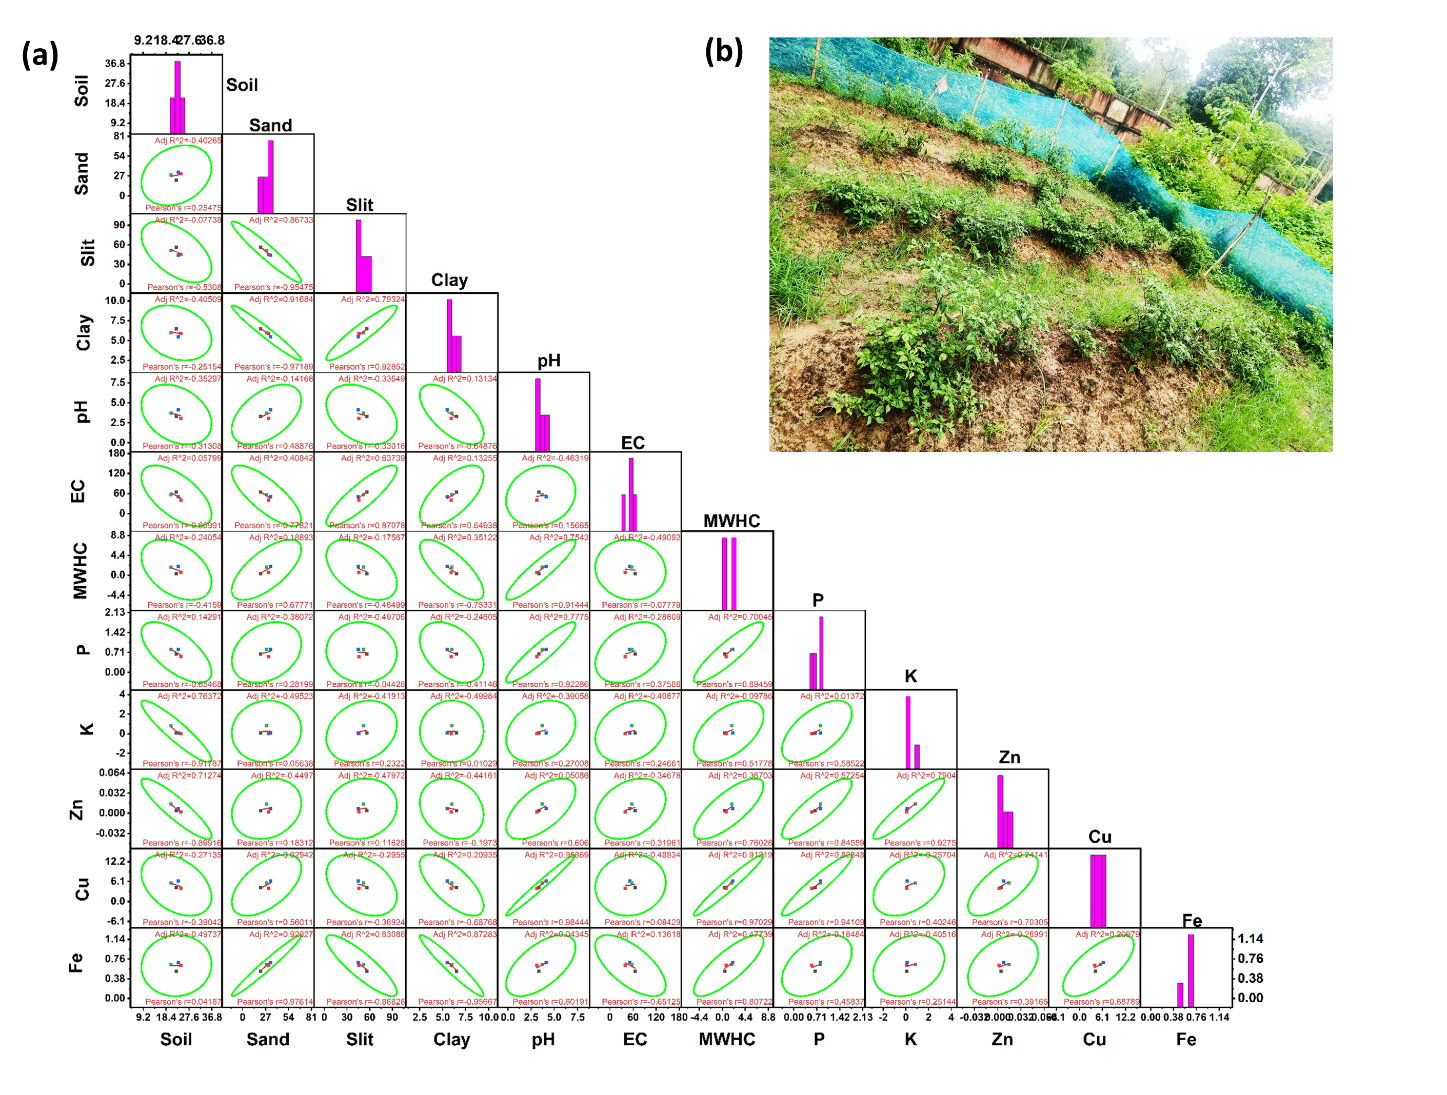


**Fig. S4** (a)Pearson correlation among the variables of soil and their interaction; (b) a view of field study at CSIR-NEIST, Jorhat, Assam.
